# Supplementary material for: Improving postal survey response using behavioural science: a nested randomised control trial
Source: Springer Nature journal article supplement (doi:10.1186/s12874-021-01476-7), 2021-12-01
Supplement: MOESM3 [file 19967512]

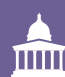

**TODAY'S DATE:** \_\_\_\_\_

**Can you remember what your most recent cervical screening result was?**

*You may have had an HPV test result or a cytology (smear) test result or both*

| HPV test                                                   |                                                                 |                                           |                                   |
|------------------------------------------------------------|-----------------------------------------------------------------|-------------------------------------------|-----------------------------------|
| <input type="checkbox"/> HPV was found                     | <input type="checkbox"/> HPV was not found                      | <input type="checkbox"/> No HPV test      | <input type="checkbox"/> Not sure |
| Cytology (smear) test                                      |                                                                 |                                           |                                   |
| <input type="checkbox"/> Normal cytology (no cell changes) | <input type="checkbox"/> Abnormal cytology (cell changes found) | <input type="checkbox"/> No cytology test | <input type="checkbox"/> Not sure |

**First, we'd like to know how you're feeling at the moment**

| Please read each statement below and tick the best box that indicates the way you feel right now |                          |                          |                          |                          |
|--------------------------------------------------------------------------------------------------|--------------------------|--------------------------|--------------------------|--------------------------|
|                                                                                                  | Not at all               | Somewhat                 | Moderately               | Very much so             |
| I feel calm                                                                                      | <input type="checkbox"/> | <input type="checkbox"/> | <input type="checkbox"/> | <input type="checkbox"/> |
| I feel tense                                                                                     | <input type="checkbox"/> | <input type="checkbox"/> | <input type="checkbox"/> | <input type="checkbox"/> |
| I feel upset                                                                                     | <input type="checkbox"/> | <input type="checkbox"/> | <input type="checkbox"/> | <input type="checkbox"/> |
| I feel relaxed                                                                                   | <input type="checkbox"/> | <input type="checkbox"/> | <input type="checkbox"/> | <input type="checkbox"/> |
| I feel content                                                                                   | <input type="checkbox"/> | <input type="checkbox"/> | <input type="checkbox"/> | <input type="checkbox"/> |
| I feel worried                                                                                   | <input type="checkbox"/> | <input type="checkbox"/> | <input type="checkbox"/> | <input type="checkbox"/> |

**Since my cervical screening (smear) result I have been feeling...**

|                                                   | Strongly agree           | Agree                    | Disagree                 | Strongly disagree        |
|---------------------------------------------------|--------------------------|--------------------------|--------------------------|--------------------------|
| In good general health                            | <input type="checkbox"/> | <input type="checkbox"/> | <input type="checkbox"/> | <input type="checkbox"/> |
| Happy about the way my body feels                 | <input type="checkbox"/> | <input type="checkbox"/> | <input type="checkbox"/> | <input type="checkbox"/> |
| In control of my body                             | <input type="checkbox"/> | <input type="checkbox"/> | <input type="checkbox"/> | <input type="checkbox"/> |
| Worried that I may have something seriously wrong | <input type="checkbox"/> | <input type="checkbox"/> | <input type="checkbox"/> | <input type="checkbox"/> |
| Concerned about my fertility                      | <input type="checkbox"/> | <input type="checkbox"/> | <input type="checkbox"/> | <input type="checkbox"/> |
| In good gynaecological health                     | <input type="checkbox"/> | <input type="checkbox"/> | <input type="checkbox"/> | <input type="checkbox"/> |
| Fearful about cervical cancer                     | <input type="checkbox"/> | <input type="checkbox"/> | <input type="checkbox"/> | <input type="checkbox"/> |
| Interested in sex                                 | <input type="checkbox"/> | <input type="checkbox"/> | <input type="checkbox"/> | <input type="checkbox"/> |
| Optimistic about my future health                 | <input type="checkbox"/> | <input type="checkbox"/> | <input type="checkbox"/> | <input type="checkbox"/> |

**How concerned do you feel about your screening result?**

Not at all concerned

Slightly Concerned

Somewhat concerned

Moderately concerned

Very concerned

**How much do you agree with the following statements?**

|                                                                      | Strongly disagree        | Disagree                 | Agree                    | Strongly agree           |
|----------------------------------------------------------------------|--------------------------|--------------------------|--------------------------|--------------------------|
| I am concerned about cervical cancer                                 | <input type="checkbox"/> | <input type="checkbox"/> | <input type="checkbox"/> | <input type="checkbox"/> |
| I am concerned about my sex life                                     | <input type="checkbox"/> | <input type="checkbox"/> | <input type="checkbox"/> | <input type="checkbox"/> |
| I am concerned about the impact of my screening result on my partner | <input type="checkbox"/> | <input type="checkbox"/> | <input type="checkbox"/> | <input type="checkbox"/> |
| I am concerned about something else                                  | <input type="checkbox"/> | <input type="checkbox"/> | <input type="checkbox"/> | <input type="checkbox"/> |

**If you are concerned about something else, please indicate what:**

---

---

---

**If you are concerned, please indicate what you are most concerned about? Please **ONLY** tick one.**

- Cervical cancer
- My sex life
- The impact of my screening result on my partner
- Something else
- Not applicable - I am not concerned

**Have you told anyone about your screening result?**

- Yes
- No
- I'd rather not say

**If yes, who did you tell?**

- Partner
- Friend
- Family
- Health professional
- Someone else (please indicate who)  
.....

**Thinking about what HPV means to you (please circle on a scale 1-10)...**

|                                                      |   |   |   |   |   |   |   |   |   |   |    |                                |                                 |
|------------------------------------------------------|---|---|---|---|---|---|---|---|---|---|----|--------------------------------|---------------------------------|
| How much does having HPV affect your life?           | 0 | 1 | 2 | 3 | 4 | 5 | 6 | 7 | 8 | 9 | 10 | <i>No affect at all</i>        | <i>Severely affects my life</i> |
| How much longer do you think you will have HPV?      | 0 | 1 | 2 | 3 | 4 | 5 | 6 | 7 | 8 | 9 | 10 | <i>A very short time</i>       | <i>Forever</i>                  |
| How much control do you feel you have over your HPV? | 0 | 1 | 2 | 3 | 4 | 5 | 6 | 7 | 8 | 9 | 10 | <i>Absolutely no control</i>   | <i>Extreme control</i>          |
| How much do you think cervical screening can help?   | 0 | 1 | 2 | 3 | 4 | 5 | 6 | 7 | 8 | 9 | 10 | <i>Not at all helpful</i>      | <i>Extremely helpful</i>        |
| How much do you experience symptoms from your HPV?   | 0 | 1 | 2 | 3 | 4 | 5 | 6 | 7 | 8 | 9 | 10 | <i>No symptoms at all</i>      | <i>Extreme symptoms</i>         |
| How concerned are you about your HPV?                | 0 | 1 | 2 | 3 | 4 | 5 | 6 | 7 | 8 | 9 | 10 | <i>Not at all concerned</i>    | <i>Extremely concerned</i>      |
| How well do you feel you understand HPV?             | 0 | 1 | 2 | 3 | 4 | 5 | 6 | 7 | 8 | 9 | 10 | <i>Don't understand at all</i> | <i>Understand very clearly</i>  |
| How much does having HPV affect you emotionally?     | 0 | 1 | 2 | 3 | 4 | 5 | 6 | 7 | 8 | 9 | 10 | <i>Not at all affected</i>     | <i>Extremely affected</i>       |

**Please list in order the three most important things that you believe caused your HPV**

The most important causes for me are...

1. \_\_\_\_\_
2. \_\_\_\_\_
3. \_\_\_\_\_

**You will be invited back to cervical screening in around 12 months. Will you attend?**

Yes, definitely

Yes, probably

Probably not

Definitely not

**Is there anything that might stop you from attending your next cervical screen (smear test)?**

---



---



---

**Do you think any of the things below might stop you from attending your next screen (smear test)?**

Please tick all that apply.

- |                                                        |                                                                                        |
|--------------------------------------------------------|----------------------------------------------------------------------------------------|
| <input type="checkbox"/> No, nothing will stop me      | <input type="checkbox"/> It's difficult to make an appointment at a time that suits me |
| <input type="checkbox"/> I might forget                | <input type="checkbox"/> I don't want to find out my test result                       |
| <input type="checkbox"/> I don't like being screened   | <input type="checkbox"/> I am at low risk of cervical cancer                           |
| <input type="checkbox"/> I find screening painful      | <input type="checkbox"/> I might be too busy                                           |
| <input type="checkbox"/> I find screening embarrassing | <input type="checkbox"/> It's not my main priority                                     |

**Have you had any symptoms recently that you think might be related to your HPV? Please list any symptoms.**

---



---



---

**We've listed a number of general symptoms that you may or may not have experienced in the last 4 weeks...**

|                       | I have experienced this symptom within the last 4 weeks |                          | If yes, I think this symptom is related to my HPV |                          |
|-----------------------|---------------------------------------------------------|--------------------------|---------------------------------------------------|--------------------------|
|                       | Yes                                                     | No                       | Yes                                               | No                       |
| Pain                  | <input type="checkbox"/>                                | <input type="checkbox"/> | <input type="checkbox"/>                          | <input type="checkbox"/> |
| Sore throat           | <input type="checkbox"/>                                | <input type="checkbox"/> | <input type="checkbox"/>                          | <input type="checkbox"/> |
| Nausea                | <input type="checkbox"/>                                | <input type="checkbox"/> | <input type="checkbox"/>                          | <input type="checkbox"/> |
| Unusual bleeding      | <input type="checkbox"/>                                | <input type="checkbox"/> | <input type="checkbox"/>                          | <input type="checkbox"/> |
| Breathlessness        | <input type="checkbox"/>                                | <input type="checkbox"/> | <input type="checkbox"/>                          | <input type="checkbox"/> |
| Weight loss           | <input type="checkbox"/>                                | <input type="checkbox"/> | <input type="checkbox"/>                          | <input type="checkbox"/> |
| Vaginal discharge     | <input type="checkbox"/>                                | <input type="checkbox"/> | <input type="checkbox"/>                          | <input type="checkbox"/> |
| Fatigue               | <input type="checkbox"/>                                | <input type="checkbox"/> | <input type="checkbox"/>                          | <input type="checkbox"/> |
| Stiff joints          | <input type="checkbox"/>                                | <input type="checkbox"/> | <input type="checkbox"/>                          | <input type="checkbox"/> |
| Sore eyes             | <input type="checkbox"/>                                | <input type="checkbox"/> | <input type="checkbox"/>                          | <input type="checkbox"/> |
| Pain during sex       | <input type="checkbox"/>                                | <input type="checkbox"/> | <input type="checkbox"/>                          | <input type="checkbox"/> |
| Wheeziness            | <input type="checkbox"/>                                | <input type="checkbox"/> | <input type="checkbox"/>                          | <input type="checkbox"/> |
| Headaches             | <input type="checkbox"/>                                | <input type="checkbox"/> | <input type="checkbox"/>                          | <input type="checkbox"/> |
| Upset stomach         | <input type="checkbox"/>                                | <input type="checkbox"/> | <input type="checkbox"/>                          | <input type="checkbox"/> |
| Weight gain           | <input type="checkbox"/>                                | <input type="checkbox"/> | <input type="checkbox"/>                          | <input type="checkbox"/> |
| Sleeping difficulties | <input type="checkbox"/>                                | <input type="checkbox"/> | <input type="checkbox"/>                          | <input type="checkbox"/> |
| Dizziness             | <input type="checkbox"/>                                | <input type="checkbox"/> | <input type="checkbox"/>                          | <input type="checkbox"/> |
| Loss of strength      | <input type="checkbox"/>                                | <input type="checkbox"/> | <input type="checkbox"/>                          | <input type="checkbox"/> |

Now please think about when you feel particularly stressed. Do you tend to...

|                                                                              | Not at all               | A little bit             | A fair amount            | A lot                    |
|------------------------------------------------------------------------------|--------------------------|--------------------------|--------------------------|--------------------------|
| Turn to work or other activities to take your mind off things                | <input type="checkbox"/> | <input type="checkbox"/> | <input type="checkbox"/> | <input type="checkbox"/> |
| Get emotional support from others                                            | <input type="checkbox"/> | <input type="checkbox"/> | <input type="checkbox"/> | <input type="checkbox"/> |
| Give up trying to deal with the situation                                    | <input type="checkbox"/> | <input type="checkbox"/> | <input type="checkbox"/> | <input type="checkbox"/> |
| Do something to try to make the situation better                             | <input type="checkbox"/> | <input type="checkbox"/> | <input type="checkbox"/> | <input type="checkbox"/> |
| Visit your GP                                                                | <input type="checkbox"/> | <input type="checkbox"/> | <input type="checkbox"/> | <input type="checkbox"/> |
| Refuse to believe what is happening                                          | <input type="checkbox"/> | <input type="checkbox"/> | <input type="checkbox"/> | <input type="checkbox"/> |
| Try to see the situation in a different light, to make it seem more positive | <input type="checkbox"/> | <input type="checkbox"/> | <input type="checkbox"/> | <input type="checkbox"/> |
| Look for extra information                                                   | <input type="checkbox"/> | <input type="checkbox"/> | <input type="checkbox"/> | <input type="checkbox"/> |
| Try to come up with a strategy about what to do                              | <input type="checkbox"/> | <input type="checkbox"/> | <input type="checkbox"/> | <input type="checkbox"/> |
| Learn to live with the situation                                             | <input type="checkbox"/> | <input type="checkbox"/> | <input type="checkbox"/> | <input type="checkbox"/> |
| Criticise yourself                                                           | <input type="checkbox"/> | <input type="checkbox"/> | <input type="checkbox"/> | <input type="checkbox"/> |
| Speak to your partner, friends or family about it                            | <input type="checkbox"/> | <input type="checkbox"/> | <input type="checkbox"/> | <input type="checkbox"/> |
| Use alcohol or other drugs to help you get through it                        | <input type="checkbox"/> | <input type="checkbox"/> | <input type="checkbox"/> | <input type="checkbox"/> |
| Pray or meditate                                                             | <input type="checkbox"/> | <input type="checkbox"/> | <input type="checkbox"/> | <input type="checkbox"/> |
| Make fun of the situation                                                    | <input type="checkbox"/> | <input type="checkbox"/> | <input type="checkbox"/> | <input type="checkbox"/> |

Do you have any comments about your NHS cervical screening test result letter or information leaflet that you received?

---



---



---

How could the NHS improve their screening result letters or information leaflets?

---



---



---

The NHS are thinking about ways they could inform women about their cervical screening test results in the future. Please tick all the ways you would be happy to receive your test results.

Letter

Text message

Email

Mobile app

**Finally, we'd like to ask you a few general background questions**

How old are you? \_\_\_\_\_

**Please tick the box that best describes your ethnic group**

- White (British or Other)   
  Black/African/Caribbean/Black British   
  Mixed/multiple ethnic groups  
 Asian/Asian British   
  Other ethnic group   
  Prefer not to say

**Are you currently diagnosed with an anxiety disorder or depression (or have you been previously)?**

|                                         | Currently diagnosed      |                          |                          | Previously diagnosed     |                          |                          |
|-----------------------------------------|--------------------------|--------------------------|--------------------------|--------------------------|--------------------------|--------------------------|
|                                         | Yes                      | No                       | Prefer not to say        | Yes                      | No                       | Prefer not to say        |
| Anxiety disorder                        | <input type="checkbox"/> | <input type="checkbox"/> | <input type="checkbox"/> | <input type="checkbox"/> | <input type="checkbox"/> | <input type="checkbox"/> |
| Depression                              | <input type="checkbox"/> | <input type="checkbox"/> | <input type="checkbox"/> | <input type="checkbox"/> | <input type="checkbox"/> | <input type="checkbox"/> |
| Other mental health diagnosis:<br>_____ | <input type="checkbox"/> | <input type="checkbox"/> | <input type="checkbox"/> | <input type="checkbox"/> | <input type="checkbox"/> | <input type="checkbox"/> |

**Do you know anyone who has ever been diagnosed with cervical cancer?**

- No   
  Yes, somebody close to me   
  Yes, somebody I know but we're not very close

**What is the highest level of education you have completed? (Please tick one only)**

- Degree or higher degree   
  Higher education qualification   
  Below degree level  
 A-levels   
  ONC/BTEC   
  O-Levels  
 No formal qualifications

**How would you describe your current relationship status? (Please tick one only)**

- Single   
  In a relationship   
  Living with partner  
 Married/in a civil partnership   
  Widowed   
  Divorced  
 Other (please specify): \_\_\_\_\_

**Thank you for taking the time to complete this questionnaire.**

**PLEASE RETURN THIS QUESTIONNAIRE TO UCL USING THE PRE-PAID ENVELOPE PROVIDED.**
